# Supplementary material for: A Five Year Randomized Controlled Trial to Assess the Efficacy and Antibody Responses to a Commercial and Autogenous Vaccine for the Prevention of Infectious Bovine Keratoconjunctivitis
Source: MDPI journal article supplement (doi:10.3390/vaccines10060916), 2022-06-09
Supplement: s1 [file s1]

**Supplementary Table S1:** Calves enrolled in each treatment group for the years analyzed in this study.

|             | <b>Autogenous</b> | <b>Commercial</b> | <b>Sham</b> | <b>Total</b> |
|-------------|-------------------|-------------------|-------------|--------------|
| <b>2017</b> | 68                | 73                | 71          | 212          |
| <b>2019</b> | 76                | 64                | 72          | 212          |
| <b>2020</b> | 85                | 85                | 78          | 248          |

**Supplementary Table S2:** Sequence of rPilA antigen and negative control scrambled peptide antigen used in this study.

| Antigen                                 | Amino Acid Sequence                                                                                                                                                                 |
|-----------------------------------------|-------------------------------------------------------------------------------------------------------------------------------------------------------------------------------------|
| Recombinant full length PilA<br>(rPilA) | MNAQKGFTLIELMIVIAIIGILAAIALPAYQ<br>DYISKSQTTRVVGELAAGKTAVDAAALFEG<br>KTPKLGKAANDTEEDIGLTTTGGTARSNL<br>MSSVNIGGGAFATGAGTLEATLGNRANKD<br>IAGAVITQSRDAEGVWTCTINGSAAPGWK<br>SKFVPTGCKEH |
| Scrambled peptide                       | NLWGEANPNSGNGCSAQALSGLQPAQMT<br>KVGDTKCSLT                                                                                                                                          |

**Supplementary Table S3:** Predicted probability of IBK development (Mean x 100%) for each combination of treatment, management group, and sex.

| Phenotype combination          | Estimate | Standard Error | Mean   | SEM     |
|--------------------------------|----------|----------------|--------|---------|
| Autogenous Black Angus Heifer  | -1.7993  | 0.2993         | 0.1419 | 0.03646 |
| Autogenous Black Angus Bull    | -1.5722  | 0.2927         | 0.1719 | 0.04166 |
| Commercial Black Angus Heifer  | -1.5201  | 0.3058         | 0.1794 | 0.04502 |
| Autogenous Red Hybrid Heifer   | -1.4603  | 0.2177         | 0.1884 | 0.03328 |
| Sham Black Angus Heifer        | -1.4499  | 0.2987         | 0.1900 | 0.04598 |
| Commercial Black Angus Bull    | -1.293   | 0.2897         | 0.2154 | 0.04895 |
| Autogenous Red Hybrid Bull     | -1.2332  | 0.2201         | 0.2256 | 0.03845 |
| Sham Black Angus Bull          | -1.2227  | 0.2918         | 0.2275 | 0.05127 |
| Commercial Red Hybrid Heifer   | -1.1811  | 0.2162         | 0.2348 | 0.03884 |
| Autogenous Black Hybrid Heifer | -1.1287  | 0.209          | 0.2444 | 0.0386  |
| Sham Red Hybrid Heifer         | -1.1109  | 0.2033         | 0.2477 | 0.03788 |
| Commercial Red Hybrid Bull     | -0.954   | 0.2053         | 0.2781 | 0.04122 |
| Autogenous Black Hybrid Bull   | -0.9016  | 0.2061         | 0.2887 | 0.04232 |
| Sham Red Hybrid Bull           | -0.8838  | 0.2055         | 0.2924 | 0.04251 |
| Commercial Black Hybrid Heifer | -0.8495  | 0.2096         | 0.2995 | 0.04398 |
| Sham Black Hybrid Heifer       | -0.7793  | 0.2083         | 0.3145 | 0.0449  |
| Commercial Black Hybrid Bull   | -0.6224  | 0.1926         | 0.3492 | 0.04376 |
| Sham Black Hybrid Bull         | -0.5521  | 0.2049         | 0.3654 | 0.04751 |

**Supplementary Table S4:** Predicted probability of retreatment (Mean x 100%) for each combination of treatment, management group, and sex.

| Phenotype combination          | Estimate | Standard Error | Mean    | SEM     |
|--------------------------------|----------|----------------|---------|---------|
| Autogenous Black Angus Heifer  | -1.7768  | 0.4526         | 0.0378  | 0.03725 |
| Commercial Black Angus Heifer  | -1.5583  | 0.4503         | 0.05958 | 0.05335 |
| Autogenous Black Angus Bull    | -1.4013  | 0.4335         | 0.08056 | 0.06479 |
| Sham Black Angus Heifer        | -1.278   | 0.4271         | 0.1006  | 0.0753  |
| Commercial Black Angus Bull    | -1.1829  | 0.4296         | 0.1184  | 0.08514 |
| Autogenous Red Hybrid Heifer   | -1.159   | 0.2726         | 0.1232  | 0.05556 |
| Commercial Red Hybrid Heifer   | -0.9405  | 0.2598         | 0.1735  | 0.06659 |
| Sham Black Angus Bull          | -0.9026  | 0.4091         | 0.1834  | 0.1086  |
| Autogenous Black Hybrid Heifer | -0.8129  | 0.2488         | 0.2081  | 0.07134 |
| Autogenous Red Hybrid Bull     | -0.7835  | 0.2536         | 0.2167  | 0.07443 |
| Sham Red Hybrid Heifer         | -0.6602  | 0.2411         | 0.2546  | 0.07735 |
| Commercial Black Hybrid Heifer | -0.5944  | 0.2185         | 0.2761  | 0.07306 |
| Commercial Red Hybrid Bull     | -0.5651  | 0.2368         | 0.286   | 0.08055 |
| Autogenous Black Hybrid Bull   | -0.4374  | 0.2391         | 0.3309  | 0.08667 |
| Sham Black Hybrid Heifer       | -0.3141  | 0.2303         | 0.3767  | 0.08747 |
| Sham Red Hybrid Bull           | -0.2848  | 0.2234         | 0.3879  | 0.0856  |
| Commercial Black Hybrid Bull   | -0.219   | 0.204          | 0.4133  | 0.07944 |
| Sham Black Hybrid Bull         | 0.06134  | 0.2238         | 0.5245  | 0.08912 |

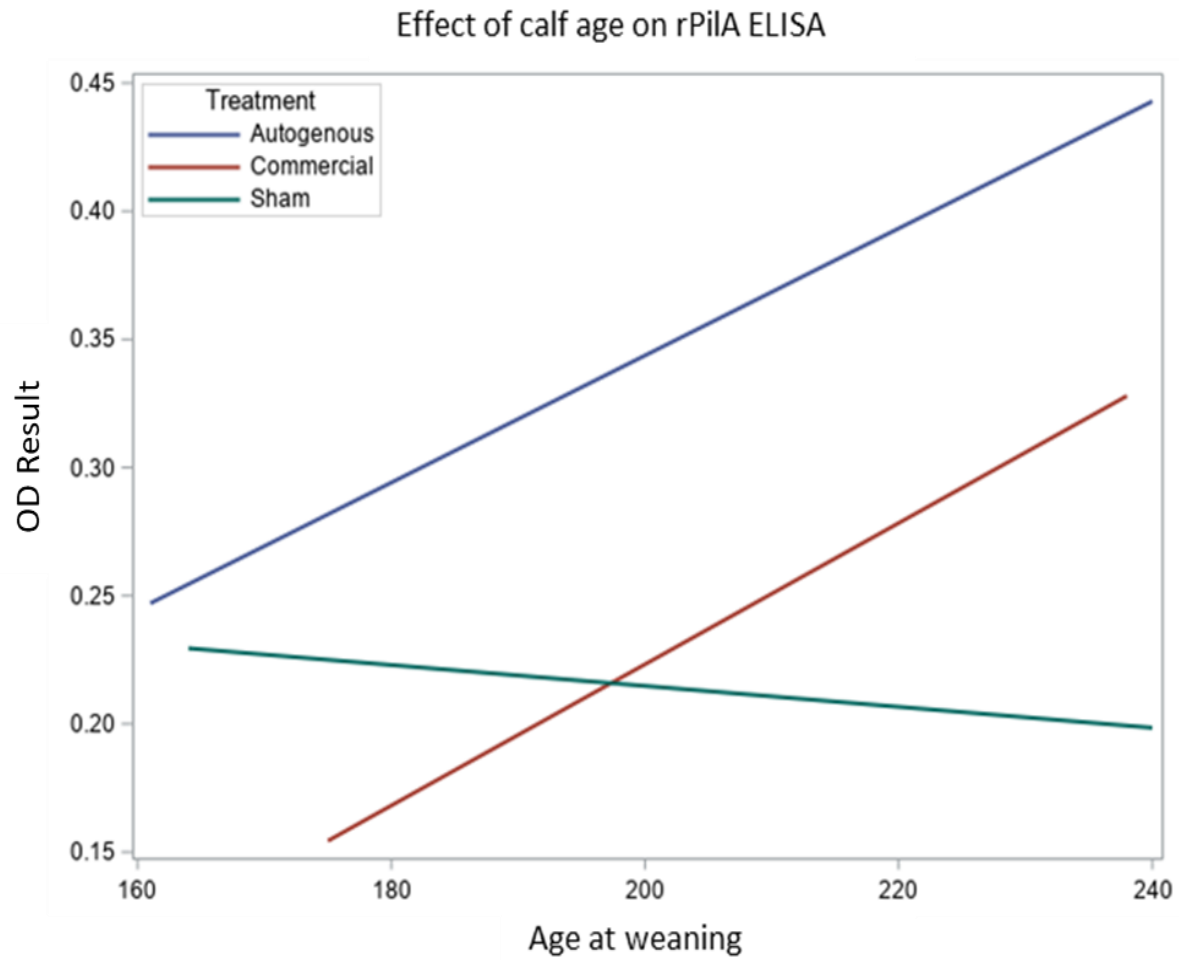

**Supplementary Figure S1:** ELISA OD result to the rPiA antigen by calf age and treatment. Age had an effect on antibody levels ( $P = 0.005$ ).

Average 205-day adjusted weaning weight by treatment and IBK diagnosis

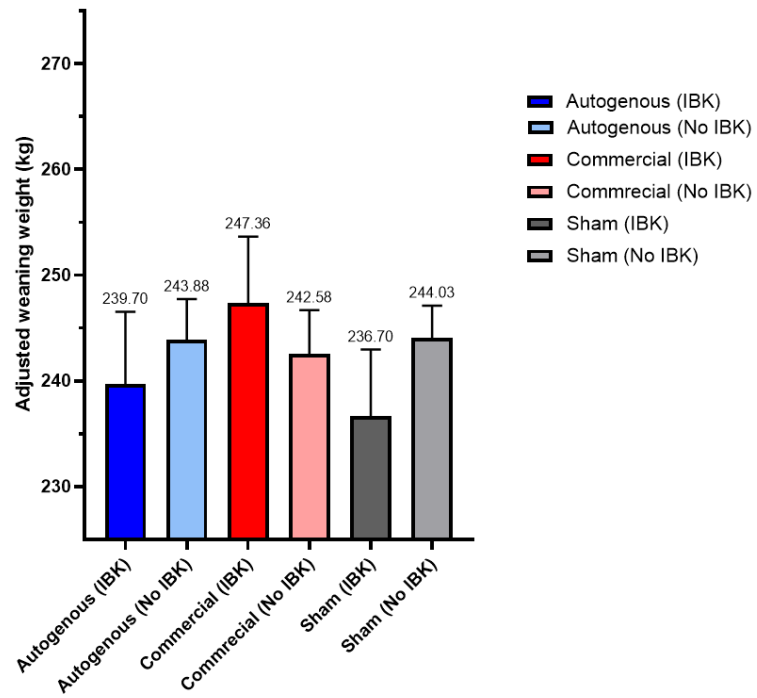

A

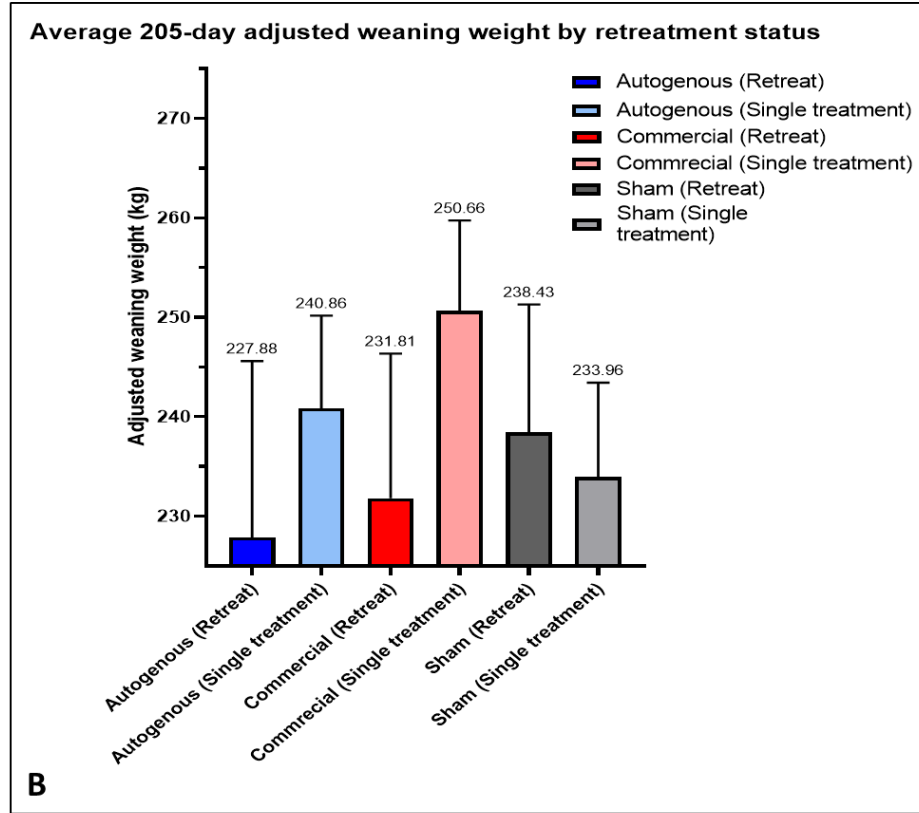

**Supplementary Figure S2:** Average 205-day adjusted weaning weight (in kg) by treatment group and IBK diagnosis (**A**). Autogenous: IBK: 239.70, No IBK: 243.88, Commercial: IBK: 247.36, No IBK: 242.58, Sham: IBK: 236.70, No IBK: 244.03. (IBK effect  $P = 0.33$ ). Average 205 day adjusted weaning weight by treatment group and retreatment status (**B**). Autogenous: Retreatment: 227.88, Single treatment: 240.86, Commercial: Retreatment: 231.81, Single treatment: 250.66, Sham: Retreatment: 238.43, Single treatment: 233.96. ( $P$  for retreatment effect = 0.06).
